# Supplementary material for: Gender Differences in Neuropsychiatric Symptoms in Mild to Moderate Alzheimer's Disease Patients Undergoing Switch of Cholinesterase Inhibitors: A Post Hoc Analysis of the EVOLUTION Study
Source: PubMed Central journal article supplement (PMC6247376; doi:10.1089/jwh.2017.6420), 2018-11-02
Supplement: Supp_Table1.pdf [file Supp_Table1.pdf]

## Supplementary Data

SUPPLEMENTARY TABLE S1. FREQUENCY OF PATIENTS WITH REMITTED NEUROPSYCHIATRIC INVENTORY SYMPTOMS DURING FOLLOW-UP

|                                   | From baseline to  | Mild-AD patients |                  |                           | Moderate-AD patients |                 |                           |
|-----------------------------------|-------------------|------------------|------------------|---------------------------|----------------------|-----------------|---------------------------|
|                                   |                   | Men,<br>N (%)    | Women,<br>N (%)  | p                         | Men,<br>N (%)        | Women,<br>N (%) | p                         |
| Delusions                         | 3-Month follow-up | 5 (4.7)          | 8 (8.3)          | 0.2875 <sup>a</sup>       | 5 (6.9)              | 10 (6.8)        | 1.000 <sup>b</sup>        |
|                                   | 6-Month follow-up | 6 (5.6)          | 9 (9.4)          | 0.3056 <sup>a</sup>       | 7 (9.6)              | 12 (8.2)        | 0.7230 <sup>a</sup>       |
|                                   | <i>N</i>          | 107 (100)        | 96 (100)         |                           | 73 (100)             | 147 (100)       |                           |
| Hallucinations                    | 3-Month follow-up | 3 (2.8)          | 5 (5.2)          | 0.4815 <sup>b</sup>       | <b>1 (1.3)</b>       | <b>14 (9.5)</b> | <b>0.0215<sup>a</sup></b> |
|                                   | 6-Month follow-up | <b>2 (1.9)</b>   | <b>8 (8.3)</b>   | <b>0.0496<sup>b</sup></b> | 3 (4.0)              | 12 (8.2)        | 0.2425 <sup>a</sup>       |
|                                   | <i>N</i>          | 106 (100)        | 96 (100)         |                           | 75 (100)             | 147 (100)       |                           |
| Agitation                         | 3-Month follow-up | <b>4 (3.6)</b>   | <b>10 (10.8)</b> | <b>0.0462<sup>a</sup></b> | 4 (5.3)              | 18 (12.1)       | 0.1093 <sup>a</sup>       |
|                                   | 6-Month follow-up | <b>6 (5.5)</b>   | <b>13 (14.0)</b> | <b>0.0378<sup>a</sup></b> | 5 (6.7)              | 19 (12.8)       | 0.1647 <sup>a</sup>       |
|                                   | <i>N</i>          | 93 (100)         | 110 (100)        |                           | 75 (100)             | 149 (100)       |                           |
| Depression                        | 3-Month follow-up | 6 (5.7)          | 13 (13.1)        | 0.0653 <sup>a</sup>       | 4 (5.3)              | 9 (5.9)         | 1.0000 <sup>b</sup>       |
|                                   | 6-Month follow-up | <b>5 (4.7)</b>   | <b>13 (13.1)</b> | <b>0.0334<sup>a</sup></b> | 7 (9.2)              | 23 (15.1)       | 0.2125 <sup>a</sup>       |
|                                   | <i>N</i>          | 106 (100)        | 99 (100)         |                           | 76 (100)             | 152 (100)       |                           |
| Anxiety                           | 3-Month follow-up | 8 (7.4)          | 11 (11.1)        | 0.3566 <sup>a</sup>       | 10 (12.7)            | 20 (13.2)       | 0.9147 <sup>a</sup>       |
|                                   | 6-Month follow-up | 10 (9.3)         | 10 (10.1)        | 0.8378 <sup>a</sup>       | 11 (13.9)            | 19 (12.5)       | 0.7600 <sup>a</sup>       |
|                                   | <i>N</i>          | 108 (100)        | 99 (100)         |                           | 79 (100)             | 152 (100)       |                           |
| Euphoria                          | 3-Month follow-up | 3 (2.9)          | 1 (1)            | 0.6228 <sup>b</sup>       | 2 (2.7)              | 8 (5.3)         | 0.5027 <sup>b</sup>       |
|                                   | 6-Month follow-up | 3 (2.9)          | 4 (4.2)          | 0.7114 <sup>b</sup>       | 2 (2.7)              | 8 (5.3)         | 0.5027 <sup>b</sup>       |
|                                   | <i>N</i>          | 105 (100)        | 96 (100)         |                           | 75 (100)             | 151 (100)       |                           |
| Apathy                            | 3-Month follow-up | 5 (4.6)          | 10 (10.2)        | 0.1153 <sup>a</sup>       | 3 (3.8)              | 15 (9.8)        | 0.1051 <sup>a</sup>       |
|                                   | 6-Month follow-up | 9 (8.2)          | 11 (11.2)        | 0.4575 <sup>a</sup>       | 4 (5.1)              | 19 (12.4)       | 0.0757 <sup>a</sup>       |
|                                   | <i>N</i>          | 110 (100)        | 98 (100)         |                           | 79 (100)             | 153 (100)       |                           |
| Disinhibition                     | 3-Month follow-up | 2 (1.9)          | 6 (6.3)          | 0.1524 <sup>b</sup>       | 3 (4.1)              | 8 (5.4)         | 1.0000 <sup>b</sup>       |
|                                   | 6-Month follow-up | <b>2 (1.2)</b>   | <b>9 (9.5)</b>   | <b>0.0182<sup>a</sup></b> | 5 (6.9)              | 15 (10.1)       | 0.4233 <sup>a</sup>       |
|                                   | <i>N</i>          | 106 (100)        | 95 (100)         |                           | 73 (100)             | 148 (100)       |                           |
| Irritability                      | 3-Month follow-up | 14 (13.1)        | 8 (8.3)          | 0.2660 <sup>a</sup>       | 11 (14.3)            | 21 (14.0)       | 0.9533 <sup>a</sup>       |
|                                   | 6-Month follow-up | 15 (14.0)        | 13 (13.4)        | 0.8983 <sup>a</sup>       | 12 (15.6)            | 22 (14.7)       | 0.8544 <sup>a</sup>       |
|                                   | <i>N</i>          | 107 (100)        | 97 (100)         |                           | 77 (100)             | 150 (100)       |                           |
| Aberrant motor behavior           | 3-Month follow-up | <b>1 (0.9)</b>   | <b>11 (11.6)</b> | <b>0.0015<sup>a</sup></b> | 5 (6.9)              | 15 (10.0)       | 0.4397 <sup>a</sup>       |
|                                   | 6-Month follow-up | <b>1 (0.9)</b>   | <b>12 (12.6)</b> | <b>0.0008<sup>a</sup></b> | 7 (9.6)              | 18 (12.0)       | 0.5923 <sup>a</sup>       |
|                                   | <i>N</i>          | 106 (100)        | 95 (100)         |                           | 73 (100)             | 150 (100)       |                           |
| Nighttime behavior disturbances   | 3-Month follow-up | 3 (3.1)          | 9 (9.7)          | 0.0596 <sup>a</sup>       | 4 (5.2)              | 16 (10.6)       | 0.1727 <sup>a</sup>       |
|                                   | 6-Month follow-up | <b>6 (6.1)</b>   | <b>14 (15.1)</b> | <b>0.0439<sup>a</sup></b> | 7 (9.1)              | 19 (12.6)       | 0.4327 <sup>a</sup>       |
|                                   | <i>N</i>          | 98 (100)         | 93 (100)         |                           | 77 (100)             | 151 (100)       |                           |
| Appetite and eating abnormalities | 3-Month follow-up | 6 (6.0)          | 11 (11.7)        | 0.1604 <sup>a</sup>       | 4 (5.5)              | 10 (6.6)        | 1.0000 <sup>b</sup>       |
|                                   | 6-Month follow-up | 6 (6.0)          | 10 (10.6)        | 0.2405 <sup>a</sup>       | 3 (4.1)              | 17 (11.3)       | 0.0786 <sup>a</sup>       |
|                                   | <i>N</i>          | 100 (100)        | 94 (100)         |                           | 73 (100)             | 151 (100)       |                           |

Results with *p*-values < 0.05 are in bold.

Percentages computed within class (mild-AD men, mild-AD women, moderate-AD men, moderate-AD women) over the total number of patients with available score within each domain.

<sup>a</sup> $\chi^2$  test (males vs. females).

<sup>b</sup>Two-sided Fisher's exact test (males vs. females).

AD, Alzheimer's disease; NPI, Neuropsychiatric Inventory.
